# Supplementary material for: Comparative Validation of Conventional and RNA-Seq Data-Derived Reference Genes for qPCR Expression Studies of Colletotrichum kahawae
Source: PLoS One. 2016 Mar 7;11(3):e0150651. doi: 10.1371/journal.pone.0150651 (PMC4780792; doi:10.1371/journal.pone.0150651)
Supplement: S4 Table — Test statistics given by the Kruskal-Wallis statistic onthre expression for C. kahawae samples, comparing the normalization factorsfollowed. (XLSX) [file pone.0150651.s009.xlsx]

## Sheet: Sheet1
S4 Table. - Statistical analysis of thr1 expression in C. kahawae samples relative to the application of different normalization factors. Test statistics given by the Kruskal-Wallis statistic onthr1 expression for C. kahawae samples, comparing the normalization factorsfollowed.
Kruskal-Wallis test
Ranks
Normalization strategies		N	Mean Rank
A29 -Ap	NF Global C. kahawae	4	13.5
	NF Best geNorm	4	12.5
	NF Best two ranking genes	4	10.75
	NF Global C. arabica-C. kahawae	4	6
	NF Worst	4	9.75
	Total	20
A29 -ApV	NF Global C. kahawae	4	6.5
	NF Best geNorm	4	4.5
	NF Best two ranking genes	4	12.5
	NF Global C. arabica-C. kahawae	4	12.75
	NF Worst	4	16.25
	Total	20
A29 -M	NF Global C. kahawae	4	7.5
	NF Best geNorm	4	5
	NF Best two ranking genes	4	9
	NF Global C. arabica-C. kahawae	4	14.5
	NF Worst	4	16.5
	Total	20
A67 -Ap	NF Global C. kahawae	4	13.5
	NF Best geNorm	4	11.5
	NF Best two ranking genes	4	15.5
	NF Global C. arabica-C. kahawae	4	9
	NF Worst	4	3
	Total	20
A67 -ApV	NF Global C. kahawae	4	10.25
	NF Best geNorm	4	8.75
	NF Best two ranking genes	4	13.5
	NF Global C. arabica-C. kahawae	4	9.5
	NF Worst	4	10.5
	Total	20
A67 -M	NF Global C. kahawae	4	10.5
	NF Best geNorm	4	7
	NF Best two ranking genes	4	12.5
	NF Global C. arabica-C. kahawae	4	15
	NF Worst	4	7.5
	Total	20
Z12 -Ap	NF Global C. kahawae	4	13.25
	NF Best geNorm	4	15
	NF Best two ranking genes	4	7.5
	NF Global C. arabica-C. kahawae	4	12.5
	NF Worst	4	4.25
	Total	20
Z12 -ApV	NF Global C. kahawae	4	10.75
	NF Best geNorm	4	12
	NF Best two ranking genes	4	12.5
	NF Global C. arabica-C. kahawae	4	7
	NF Worst	4	10.25
	Total	20
Z12 -M	NF Global C. kahawae	4	9
	NF Best geNorm	4	8.25
	NF Best two ranking genes	4	10
	NF Global C. arabica-C. kahawae	4	9.5
	NF Worst	4	15.75
	Total	20
Q2 -Ap	NF Global C. kahawae	4	13.5
	NF Best geNorm	4	10.25
	NF Best two ranking genes	4	15.5
	NF Global C. arabica-C. kahawae	4	10.75
	NF Worst	4	2.5
	Total	20
Q2 -ApV	NF Global C. kahawae	4	13.25
	NF Best geNorm	4	11
	NF Best two ranking genes	4	13
	NF Global C. arabica-C. kahawae	4	12.75
	NF Worst	4	2.5
	Total	20
Q2 -M	NF Global C. kahawae	4	11.5
	NF Best geNorm	4	9.25
	NF Best two ranking genes	4	15.25
	NF Global C. arabica-C. kahawae	4	13.75
	NF Worst	4	2.75
	Total	20
Test Statistics a,b
	A29 -Ap	A29 -ApV	A29 -M	A67 -Ap	A67 -ApV	A67 -M	Z12 -Ap	Z12 -ApV	Z12 -M	Q2 -Ap	Q2 -ApV	Q2 -M
Chi-Square	3.87143	10.7571	10.6857	10.6857	1.5	5.2	9.14232	2.12857	4.14415	11.2143	9.5	10.9429
df	4	4	4	4	4	4	4	4	4	4	4	4
Asymp. Sig.	0.423686	0.0294333	0.0303327	0.0303327	0.826641	0.267385	0.057639	0.712125	0.386849	0.0242584	0.0497472	0.0272138
a. Kruskal Wallis test
b. Grouping Variable: Normalization strategies
Kruskal-Wallis test
Ranks
Normalization strategies		N	Mean Rank
A29 -Ap	NF Global C. kahawae	4	11.5
	NF Best geNorm	4	9.75
	NF Best two ranking genes	4	8.75
	NF Global C. arabica-C. kahawae	4	4
	Total	16
A29 -ApV	NF Global C. kahawae	4	6.5
	NF Best geNorm	4	4.5
	NF Best two ranking genes	4	10.5
	NF Global C. arabica-C. kahawae	4	12.5
	Total	16
A29 -M	NF Global C. kahawae	4	7.25
	NF Best geNorm	4	5
	NF Best two ranking genes	4	8.5
	NF Global C. arabica-C. kahawae	4	13.25
	Total	16
A67 -Ap	NF Global C. kahawae	4	9.5
	NF Best geNorm	4	7.5
	NF Best two ranking genes	4	11.5
	NF Global C. arabica-C. kahawae	4	5.5
	Total	16
A67 -ApV	NF Global C. kahawae	4	8.25
	NF Best geNorm	4	6.75
	NF Best two ranking genes	4	11.5
	NF Global C. arabica-C. kahawae	4	7.5
	Total	16
A67 -M	NF Global C. kahawae	4	7.5
	NF Best geNorm	4	5
	NF Best two ranking genes	4	9.5
	NF Global C. arabica-C. kahawae	4	12
	Total	16
Z12 -Ap	NF Global C. kahawae	4	9.25
	NF Best geNorm	4	11
	NF Best two ranking genes	4	4.75
	NF Global C. arabica-C. kahawae	4	9
	Total	16
Z12 -ApV	NF Global C. kahawae	4	8.5
	NF Best geNorm	4	9.5
	NF Best two ranking genes	4	10
	NF Global C. arabica-C. kahawae	4	6
	Total	16
Z12 -M	NF Global C. kahawae	4	8.75
	NF Best geNorm	4	7.75
	NF Best two ranking genes	4	9
	NF Global C. arabica-C. kahawae	4	8.5
	Total	16
Q2 -Ap	NF Global C. kahawae	4	9.5
	NF Best geNorm	4	6.25
	NF Best two ranking genes	4	11.5
	NF Global C. arabica-C. kahawae	4	6.75
	Total	16
Q2 -ApV	NF Global C. kahawae	4	9.25
	NF Best geNorm	4	7
	NF Best two ranking genes	4	9
	NF Global C. arabica-C. kahawae	4	8.75
	Total	16
Q2 -M	NF Global C. kahawae	4	7.5
	NF Best geNorm	4	5.5
	NF Best two ranking genes	4	11.25
	NF Global C. arabica-C. kahawae	4	9.75
	Total	16
Test Statistics a,b
	A29 -Ap	A29 -ApV	A29 -M	A67 -Ap	A67 -ApV	A67 -M	Z12 -Ap	Z12 -ApV	Z12 -M	Q2 -Ap	Q2 -ApV	Q2 -M
Chi-Square	5.44853	7.05882	6.41912	3.52941	2.31618	4.67647	3.73894	1.67647	0.155556	3.19853	0.551471	3.375
df	3	3	3	3	3	3	3	3	3	3	3	3
Asymp. Sig.	0.14175	0.0700463	0.0929075	0.316968	0.509429	0.197079	0.291069	0.642178	0.984423	0.362017	0.907446	0.33734
a. Kruskal Wallis test
b. Grouping Variable: Normalization strategies
Kruskal-Wallis test
Ranks
Normalization strategies		N	Mean Rank
A29 -Ap	NF Global C. kahawae	4	7.5
	NF Best geNorm	4	6.75
	NF Best two ranking genes	4	5.25
	Total	12
A29 -ApV	NF Global C. kahawae	4	6.5
	NF Best geNorm	4	4.5
	NF Best two ranking genes	4	8.5
	Total	12
A29 -M	NF Global C. kahawae	4	6.75
	NF Best geNorm	4	4.75
	NF Best two ranking genes	4	8
	Total	12
A67 -Ap	NF Global C. kahawae	4	6.5
	NF Best geNorm	4	4.5
	NF Best two ranking genes	4	8.5
	Total	12
A67 -ApV	NF Global C. kahawae	4	6.25
	NF Best geNorm	4	4.75
	NF Best two ranking genes	4	8.5
	Total	12
A67 -M	NF Global C. kahawae	4	6.5
	NF Best geNorm	4	4.5
	NF Best two ranking genes	4	8.5
	Total	12
Z12 -Ap	NF Global C. kahawae	4	7.5
	NF Best geNorm	4	8.5
	NF Best two ranking genes	4	3.5
	Total	12
Z12 -ApV	NF Global C. kahawae	4	5.75
	NF Best geNorm	4	6.5
	NF Best two ranking genes	4	7.25
	Total	12
Z12 -M	NF Global C. kahawae	4	6.75
	NF Best geNorm	4	5.75
	NF Best two ranking genes	4	7
	Total	12
Q2 -Ap	NF Global C. kahawae	4	6.5
	NF Best geNorm	4	4.5
	NF Best two ranking genes	4	8.5
	Total	12
Q2 -ApV	NF Global C. kahawae	4	7.25
	NF Best geNorm	4	5.25
	NF Best two ranking genes	4	7
	Total	12
Q2 -M	NF Global C. kahawae	4	6.5
	NF Best geNorm	4	4.5
	NF Best two ranking genes	4	8.5
	Total	12
Test Statistics a,b
	A29 -Ap	A29 -ApV	A29 -M	A67 -Ap	A67 -ApV	A67 -M	Z12 -Ap	Z12 -ApV	Z12 -M	Q2 -Ap	Q2 -ApV	Q2 -M
Chi-Square	0.807692	2.46154	1.65385	2.46154	2.19231	2.46154	4.30769	0.346154	0.274021	2.46154	0.730769	2.46154
df	2	2	2	2	2	2	2	2	2	2	2	2
Asymp. Sig.	0.667747	0.292068	0.437393	0.292068	0.334154	0.292068	0.116037	0.841073	0.871961	0.292068	0.69393	0.292068
a. Kruskal Wallis test
b. Grouping Variable: Normalization strategies
Kruskal-Wallis test
Ranks
Normalization strategies		N	Mean Rank
A29 -Ap	NF Global C. kahawae	4	4.5
	NF Best geNorm	4	4.5
	Total	8
A29 -ApV	NF Global C. kahawae	4	5.5
	NF Best geNorm	4	3.5
	Total	8
A29 -M	NF Global C. kahawae	4	5.25
	NF Best geNorm	4	3.75
	Total	8
A67 -Ap	NF Global C. kahawae	4	5.25
	NF Best geNorm	4	3.75
	Total	8
A67 -ApV	NF Global C. kahawae	4	5.25
	NF Best geNorm	4	3.75
	Total	8
A67 -M	NF Global C. kahawae	4	5.5
	NF Best geNorm	4	3.5
	Total	8
Z12 -Ap	NF Global C. kahawae	4	4
	NF Best geNorm	4	5
	Total	8
Z12 -ApV	NF Global C. kahawae	4	4.25
	NF Best geNorm	4	4.75
	Total	8
Z12 -M	NF Global C. kahawae	4	4.75
	NF Best geNorm	4	4.25
	Total	8
Q2 -Ap	NF Global C. kahawae	4	5.5
	NF Best geNorm	4	3.5
	Total	8
Q2 -ApV	NF Global C. kahawae	4	5.25
	NF Best geNorm	4	3.75
	Total	8
Q2 -M	NF Global C. kahawae	4	5.5
	NF Best geNorm	4	3.5
	Total	8
Test Statistics a,b
	A29 -Ap	A29 -ApV	A29 -M	A67 -Ap	A67 -ApV	A67 -M	Z12 -Ap	Z12 -ApV	Z12 -M	Q2 -Ap	Q2 -ApV	Q2 -M
Chi-Square	0	1.33333	0.75	0.75	0.75	1.33333	0.333333	0.0833333	0.0875	1.33333	0.75	1.33333
df	1	1	1	1	1	1	1	1	1	1	1	1
Asymp. Sig.	1	0.248213	0.386476	0.386476	0.386476	0.248213	0.563703	0.77283	0.76738	0.248213	0.386476	0.248213
a. Kruskal Wallis test
b. Grouping Variable: Normalization strategies
